# Supplementary material for: Risks of deep vein thrombosis, pulmonary embolism, and bleeding after covid-19: nationwide self-controlled cases series and matched cohort study
Source: PubMed Central journal article supplement — BMJ. 2022 Apr 6;377:e069590. doi: 10.1136/bmj-2021-069590 (PMC8984137; doi:10.1136/bmj-2021-069590), 2022-04-06
Supplement: kati069590.ww.pdf [file kati069590.ww.pdf]

## Supplementary Tables and Figures

**Table 1.** Distribution of dates underlying the COVID date

| <b>Date</b>           | <b>Frequency</b> | <b>Percentage</b> |
|-----------------------|------------------|-------------------|
| <b>Disease onset</b>  | 647 564          | 61.3              |
| <b>Sample date</b>    | 362 903          | 34.3              |
| <b>Diagnosis date</b> | 9646             | 0.9               |
| <b>Date of report</b> | 37 061           | 3.5               |

**Table 2.** International Classification of Diseases (ICD) main or contributing diagnosis codes used to identify the first event of pulmonary embolism (PE), deep vein thrombosis (DVT) and bleeding.

| <b>Outcome</b>             | <b>ICD9 (1987-1996)</b>                                                                                                    | <b>ICD10 (1997 – to date)</b>                                                                                                |
|----------------------------|----------------------------------------------------------------------------------------------------------------------------|------------------------------------------------------------------------------------------------------------------------------|
| Deep vein thrombosis (DVT) | 451B<br>451C<br>451W<br>451X<br>452X<br>453C<br>453D<br>453W<br>453X<br>671D<br>671E                                       | I801<br>I802<br>I803<br>I808<br>I809<br>I819<br>I822<br>I823<br>I828<br>I829<br>O223<br>O871                                 |
| Pulmonary embolism (PE)    | 415B<br>673C                                                                                                               | I260<br>I269<br>O882                                                                                                         |
| Bleeding                   | 285B<br>286F<br>430<br>431<br>432A<br>432B<br>432X<br>511W<br>578A<br>578B<br>578X<br>599H<br>626G<br>627B<br>719B<br>786D | D629<br>D683<br>I600<br>I601<br>I602<br>I603<br>I604<br>I605<br>I606<br>I607<br>I608<br>I609<br>I610<br>I611<br>I612<br>I613 |

|  |  |                                                                                                                                               |
|--|--|-----------------------------------------------------------------------------------------------------------------------------------------------|
|  |  | I614<br>I615<br>I616<br>I617<br>I619<br>I620<br>I621<br>I629<br>J942<br>K920<br>K921<br>K922<br>N939<br>M250<br>N950<br>R042<br>R319<br>T140A |
|--|--|-----------------------------------------------------------------------------------------------------------------------------------------------|

**Table 3** Relative incidence of DVT, PE and Bleeding following COVID-19 using the SCCS method, with cases who died during the observation period excluded

| Risk period (days) | DVT |                    | PE  |                      | Bleeding |                   |
|--------------------|-----|--------------------|-----|----------------------|----------|-------------------|
|                    | n   | RI (95% CI)        | n   | RI (95% CI)          | n        | RI (95% CI)       |
| Control period     | 745 | 1.00 (ref)         | 494 | 1.00 (ref)           | 4120     | 1.00 (ref)        |
| -30 to -4          | 66  | 1.14 (0.88, 1.48)  | 99  | 2.37 (1.89, 2.98)    | 486      | 1.45 (1.32, 1.60) |
| -3 to 0            | 74  | 8.84 (6.89, 11.35) | 270 | 43.14 (36.53, 50.94) | 231      | 4.71 (4.11, 5.40) |
| 1 to 7             | 74  | 5.10 (3.97, 6.55)  | 404 | 36.90 (31.68, 42.98) | 255      | 2.99 (2.62, 3.41) |
| 8 to 14            | 110 | 7.73 (6.23, 9.58)  | 545 | 50.05 (43.26, 57.90) | 221      | 2.62 (2.28, 3.02) |
| 15 to 30           | 172 | 5.54 (4.60, 6.66)  | 537 | 22.27 (19.19, 25.85) | 336      | 1.80 (1.60, 2.03) |
| 31 to 60           | 132 | 2.52 (2.05, 3.10)  | 163 | 4.10 (3.35, 5.02)    | 466      | 1.47 (1.32, 1.63) |
| 61 to 90           | 66  | 1.44 (1.10, 1.90)  | 82  | 2.42 (1.86, 3.14)    | 282      | 1.02 (0.89, 1.16) |
| 91 to 180          | 123 | 1.13 (0.90, 1.42)  | 115 | 1.51 (1.18, 1.94)    | 623      | 1.03 (0.93, 1.14) |

**Note on Supplementary Tables 4-6:** In these tables, the RI for the baseline population relate to the comparison between each risk period and control periods, for that baseline population. The RI for sex, age group and wave are the interaction terms relative to the baseline population.

**Table 4.** Effect modification for deep vein thrombosis by sex; age (<50 years, 50 to <70 years, and 70+ years); and pandemic wave (wave 1: before Aug. 1, 2020; wave 2: between Aug. 1, 2020 but before Feb 1, 2021; wave 3: on or after Feb 1, 2021) in the SCCS.

| Risk period        | Baseline population<br>(males under 50 in wave 1) |              | Sex<br>(ref M)       |            | Age 50 – 70 (ref < 50) |            | Age 70+<br>(ref <50) |            | Wave 2<br>(ref wave 1) |            | Wave 3<br>(ref wave 1) |            |
|--------------------|---------------------------------------------------|--------------|----------------------|------------|------------------------|------------|----------------------|------------|------------------------|------------|------------------------|------------|
|                    | RI                                                | 95% CI       | RI                   | 95% CI     | RI                     | 95% CI     | RI                   | 95% CI     | RI                     | 95% CI     | RI                     | 95% CI     |
| -30 to -4          | 1.38                                              | 0.68, 2.78   | 1.13                 | 0.74, 1.74 | 1.08                   | 0.59, 1.96 | 2.13                 | 1.22, 3.73 | 0.54                   | 0.29, 1.01 | 0.62                   | 0.31, 1.25 |
| -3 to 0            | 28.68                                             | 15.50, 53.09 | 0.99                 | 0.62, 1.57 | 1.14                   | 0.64, 2.03 | 1.03                 | 0.56, 1.90 | 0.14                   | 0.08, 0.26 | 0.17                   | 0.09, 0.34 |
| 1 to 7             | 7.91                                              | 4.03, 15.52  | 1.14                 | 0.74, 1.76 | 1.44                   | 0.78, 2.66 | 2.51                 | 1.38, 4.58 | 0.17                   | 0.09, 0.32 | 0.46                   | 0.24, 0.87 |
| 8 to 14            | 20.42                                             | 11.72, 35.57 | 0.60                 | 0.39, 0.91 | 1.49                   | 0.93, 2.40 | 0.73                 | 0.41, 1.29 | 0.29                   | 0.17, 0.51 | 0.24                   | 0.13, 0.46 |
| 15 to 30           | 6.98                                              | 4.11, 11.85  | 0.84                 | 0.60, 1.18 | 1.49                   | 1.02, 2.19 | 0.71                 | 0.43, 1.16 | 0.48                   | 0.28, 0.83 | 0.86                   | 0.47, 1.56 |
| 31 to 60           | 3.18                                              | 1.81, 5.59   | 0.98                 | 0.68, 1.41 | 1.15                   | 0.73, 1.80 | 1.40                 | 0.88, 2.25 | 0.48                   | 0.27, 0.85 | 0.81                   | 0.42, 1.56 |
| 61 to 90           | 2.19                                              | 1.09, 4.39   | 0.97                 | 0.59, 1.61 | 0.83                   | 0.45, 1.51 | 0.97                 | 0.52, 1.81 | 0.55                   | 0.27, 1.09 | 0.83                   | 0.33, 2.07 |
| 91 to 180          | 0.78                                              | 0.44, 1.40   | 0.89                 | 0.60, 1.31 | 1.23                   | 0.74, 2.03 | 1.65                 | 1.00, 2.73 | 1.20                   | 0.66, 2.16 | 2.25                   | 0.60, 8.39 |
| LRT, df<br>p-value | -                                                 |              | 8.461, 8df<br>0.3898 |            | 52.26, 16df<br><0.0001 |            |                      |            | 96.69, 16df<br><0.0001 |            |                        |            |

LRT: likelihood ratio test; df: degrees of freedom.

**Table 5.** Effect modification for pulmonary embolism following COVID-19 by sex; age (<50 years, 50 to <70 years, and 70+ years); and pandemic wave (wave 1: before Aug. 1, 2020; wave 2: between Aug. 1, 2020 but before Feb 1, 2021; wave 3: on or after Feb 1, 2021) in the SCCS.

| Risk period        | Baseline population<br>(males under 50 in<br>wave 1) |               | Sex<br>(ref M)        |            | Age 50 – 70 (ref <<br>50) |            | Age 70+<br>(ref <50) |             | Wave 2<br>(ref wave 1) |            | Wave 3<br>(ref wave 1) |             |
|--------------------|------------------------------------------------------|---------------|-----------------------|------------|---------------------------|------------|----------------------|-------------|------------------------|------------|------------------------|-------------|
|                    | RI                                                   | 95% CI        | RI                    | 95% CI     | RI                        | 95% CI     | RI                   | 95% CI      | RI                     | 95% CI     | RI                     | 95% CI      |
| -30 to -4          | 0.90                                                 | 0.39, 2.08    | 1.11                  | 0.77, 1.59 | 3.32                      | 1.50, 7.31 | 6.35                 | 3.00, 13.45 | 0.59                   | 0.34, 1.02 | 0.63                   | 0.33, 1.21  |
| -3 to 0            | 64.06                                                | 40.04, 102.48 | 0.66                  | 0.50, 0.87 | 1.46                      | 0.99, 2.17 | 1.44                 | 0.98, 2.11  | 0.37                   | 0.23, 0.59 | 0.58                   | 0.34, 1.00  |
| 1 to 7             | 55.42                                                | 36.41, 84.35  | 0.64                  | 0.50, 0.82 | 1.23                      | 0.89, 1.70 | 1.18                 | 0.85, 1.62  | 0.48                   | 0.31, 0.76 | 0.89                   | 0.53, 1.49  |
| 8 to 14            | 56.97                                                | 37.71, 86.09  | 0.52                  | 0.41, 0.66 | 1.60                      | 1.18, 2.16 | 0.92                 | 0.68, 1.26  | 0.65                   | 0.41, 1.02 | 1.36                   | 0.81, 2.28  |
| 15 to 30           | 16.00                                                | 10.38, 24.66  | 0.56                  | 0.44, 0.71 | 1.98                      | 1.45, 2.72 | 1.16                 | 0.84, 1.62  | 0.91                   | 0.57, 1.47 | 1.77                   | 1.03, 3.05  |
| 31 to 60           | 3.47                                                 | 1.96, 6.13    | 0.55                  | 0.39, 0.78 | 1.37                      | 0.87, 2.15 | 1.50                 | 0.95, 2.35  | 0.99                   | 0.56, 1.77 | 2.07                   | 1.06, 4.04  |
| 61 to 90           | 1.47                                                 | 0.69, 3.15    | 0.62                  | 0.39, 0.97 | 1.33                      | 0.72, 2.46 | 1.60                 | 0.88, 2.91  | 1.69                   | 0.82, 3.47 | 2.66                   | 1.04, 6.78  |
| 91 to 180          | 0.87                                                 | 0.46, 1.63    | 0.90                  | 0.60, 1.34 | 1.80                      | 1.03, 3.14 | 1.56                 | 0.89, 2.75  | 1.32                   | 0.72, 2.45 | 4.40                   | 1.16, 16.63 |
| LRT, df<br>p-value | -                                                    |               | 48.38, 8df<br><0.0001 |            | 95.55, 16df<br><0.0001    |            |                      |             | 79.79, 16df<br><0.0001 |            |                        |             |

LRT: likelihood ratio test; df: degrees of freedom.

**Table 6.** Effect modification for bleeding by sex; age (<50 years, 50 to <70 years, and 70+ years); and pandemic wave (wave 1: before Aug. 1, 2020; wave 2: between Aug. 1, 2020 but before Feb 1, 2021; wave 3: on or after Feb 1, 2021) in the SCCS.

| Risk period        | Baseline population<br>(males under 50 in wave 1) |             | Sex<br>(ref M)     |            | Age 50 – 70 (ref < 50)  |            | Age 70+<br>(ref <50) |            | Wave 2<br>(ref wave 1) |            | Wave 3<br>(ref wave 1) |            |
|--------------------|---------------------------------------------------|-------------|--------------------|------------|-------------------------|------------|----------------------|------------|------------------------|------------|------------------------|------------|
|                    | RI                                                | 95% CI      | RI                 | 95% CI     | RI                      | 95% CI     | RI                   | 95% CI     | RI                     | 95% CI     | RI                     | 95% CI     |
| -30 to -4          | 1.57                                              | 1.17, 2.10  | 0.83               | 0.70, 0.99 | 1.27                    | 1.00, 1.62 | 2.76                 | 2.20, 3.46 | 0.60                   | 0.47, 0.77 | 0.57                   | 0.43, 0.76 |
| -3 to 0            | 10.74                                             | 7.44, 15.51 | 0.50               | 0.39, 0.64 | 1.25                    | 0.89, 1.76 | 2.21                 | 1.60, 3.05 | 0.33                   | 0.24, 0.44 | 0.32                   | 0.23, 0.46 |
| 1 to 7             | 6.48                                              | 4.60, 9.13  | 0.52               | 0.42, 0.65 | 1.11                    | 0.82, 1.50 | 2.10                 | 1.58, 2.81 | 0.40                   | 0.30, 0.54 | 0.46                   | 0.33, 0.65 |
| 8 to 14            | 3.95                                              | 2.65, 5.89  | 0.63               | 0.49, 0.80 | 1.46                    | 1.06, 2.01 | 1.75                 | 1.25, 2.45 | 0.46                   | 0.33, 0.66 | 0.67                   | 0.46, 0.98 |
| 15 to 30           | 1.86                                              | 1.31, 2.66  | 0.92               | 0.74, 1.14 | 1.44                    | 1.10, 1.88 | 2.07                 | 1.56, 2.75 | 0.49                   | 0.35, 0.67 | 0.85                   | 0.60, 1.19 |
| 31 to 60           | 1.94                                              | 1.43, 2.62  | 0.80               | 0.66, 0.96 | 1.10                    | 0.87, 1.38 | 1.51                 | 1.19, 1.92 | 0.60                   | 0.45, 0.80 | 0.72                   | 0.52, 1.00 |
| 61 to 90           | 0.81                                              | 0.54, 1.21  | 1.12               | 0.88, 1.43 | 0.93                    | 0.70, 1.23 | 1.21                 | 0.90, 1.63 | 1.13                   | 0.78, 1.63 | 1.07                   | 0.67, 1.72 |
| 91 to 180          | 0.98                                              | 0.76, 1.27  | 0.98               | 0.83, 1.17 | 1.07                    | 0.88, 1.32 | 1.20                 | 0.96, 1.49 | 0.94                   | 0.73, 1.21 | 0.77                   | 0.38, 1.58 |
| LRT, df<br>p-value | -                                                 |             | 74.01, 8df <0.0001 |            | 159.4, 16 df<br><0.0001 |            |                      |            | 115.6, 16df<br><0.0001 |            |                        |            |

LRT: likelihood ratio test; df: degrees of freedom.

**Note on Tables 7 – 9.** The results in each table were obtained using a SCCS model with a common temporal effect

**Table 7.** Relative incidence of DVT stratified by COVID-19 disease severity using the SCCS method.

| Risk period (days) | Mild |                   | Hospitalized |                      | Intensive care |                       |
|--------------------|------|-------------------|--------------|----------------------|----------------|-----------------------|
|                    | n    | RI (95% CI)       | n            | RI (95% CI)          | n              | RI (95% CI)           |
| Control period     | 652  | 1.00 (ref)        | 157          | 1.00 (ref)           | 17             | 1.00 (ref)            |
| -30 to -4          | 46   | 0.81 (0.60, 1.11) | 48           | 3.18 (2.29, 4.42)    | 4              | 2.53 (0.85, 7.56)     |
| -3 to 0            | 16   | 1.94 (1.17, 3.21) | 58           | 26.27 (19.28, 35.79) | 15             | 65.06 (32.32, 130.96) |
| 1 to 7             | 9    | 0.64 (0.33, 1.24) | 54           | 14.54 (10.59, 19.97) | 34             | 85.91 (47.55, 155.22) |
| 8 to 14            | 41   | 3.01 (2.17, 4.17) | 50           | 14.73 (10.63, 20.43) | 31             | 80.27 (43.95, 146.61) |
| 15 to 30           | 105  | 3.59 (2.86, 4.50) | 60           | 8.57 (6.30, 11.67)   | 17             | 20.88 (10.54, 41.31)  |
| 31 to 60           | 91   | 1.86 (1.46, 2.37) | 40           | 3.36 (2.34, 4.81)    | 15             | 11.55 (5.70, 23.44)   |
| 61 to 90           | 48   | 1.12 (0.81, 1.53) | 12           | 1.13 (0.62, 2.06)    | 10             | 8.69 (3.91, 19.30)    |
| 91 to 180          | 97   | 1.01 (0.78, 1.31) | 27           | 0.98 (0.64, 1.50)    | 7              | 1.99 (0.81, 4.89)     |
|                    |      |                   |              |                      |                |                       |
| 1 to 30            | 155  | 2.71 (2.23, 3.30) | 164          | 11.67 (9.27, 14.71)  | 82             | 51.79 (30.34, 88.43)  |



**Table 8.** Relative incidence of PE stratified by COVID-19 disease severity using the SCCS method.

| Risk period (days) | Mild |                   | Hospitalized |                       | Intensive care |                         |
|--------------------|------|-------------------|--------------|-----------------------|----------------|-------------------------|
|                    | n    | RI (95% CI)       | n            | RI (95% CI)           | n              | RI (95% CI)             |
| Control period     | 412  |                   | 168          |                       | 23             |                         |
| -30 to -4          | 37   | 0.90 (0.64, 1.27) | 112          | 6.65 (5.20, 8.51)     | 8              | 3.50 (1.56, 7.84)       |
| -3 to 0            | 19   | 3.05 (1.91, 4.87) | 228          | 88.99 (72.17, 109.73) | 89             | 254.81 (160.50, 404.54) |
| 1 to 7             | 19   | 1.81 (1.14, 2.89) | 346          | 79.62 (65.45, 96.85)  | 165            | 270.22 (173.89, 419.90) |
| 8 to 14            | 51   | 5.11 (3.77, 6.92) | 391          | 97.24 (80.09, 118.05) | 199            | 329.88 (213.04, 510.80) |
| 15 to 30           | 169  | 7.83 (6.40, 9.59) | 313          | 36.48 (29.81, 44.66)  | 108            | 84.77 (53.70, 133.80)   |
| 31 to 60           | 62   | 1.70 (1.28, 2.27) | 83           | 5.90 (4.47, 7.79)     | 45             | 24.51 (14.70, 40.86)    |
| 61 to 90           | 38   | 1.21 (0.85, 1.73) | 41           | 3.31 (2.32, 4.74)     | 17             | 11.63 (6.14, 22.00)     |
| 91 to 180          | 81   | 1.21 (0.91, 1.61) | 32           | 1.07 (0.71, 1.59)     | 11             | 2.99 (1.44, 6.22)       |
|                    |      |                   |              |                       |                |                         |
| 1 to 30            | 239  | 5.87 (4.88, 7.05) | 1050         | 64.49 (53.91, 77.15)  | 472            | 196.98 (128.71, 301.46) |

**Table 9.** Relative incidence of Bleeding stratified by COVID-19 disease severity using the SCCS method.

| Risk period    | Mild |                   | Hospitalized |                      | Intensive care |                      |
|----------------|------|-------------------|--------------|----------------------|----------------|----------------------|
|                | n    | RI (95% CI)       | n            | RI (95% CI)          | n              | RI (95% CI)          |
| Control period | 3636 | 1.00 (ref)        | 788          | 1.00 (ref)           | 75             | 1.00 (ref)           |
| -30 to -4      | 358  | 1.08 (0.96, 1.21) | 258          | 3.23 (2.80, 3.73)    | 30             | 4.04 (2.64, 6.18)    |
| -3 to 0        | 63   | 1.29 (1.00, 1.66) | 199          | 16.90 (14.42, 19.82) | 43             | 39.28 (26.92, 57.32) |
| 1 to 7         | 66   | 0.78 (0.61, 1.00) | 220          | 11.10 (9.52, 12.94)  | 71             | 38.47 (27.71, 53.43) |
| 8 to 14        | 80   | 0.98 (0.78, 1.22) | 134          | 7.58 (6.29, 9.13)    | 53             | 30.38 (21.27, 43.40) |
| 15 to 30       | 203  | 1.14 (0.98, 1.32) | 122          | 3.43 (2.82, 4.16)    | 53             | 14.67 (10.26, 20.97) |
| 31 to 60       | 329  | 1.10 (0.98, 1.25) | 142          | 2.38 (1.98, 2.86)    | 30             | 5.77 (3.75, 8.88)    |
| 61 to 90       | 238  | 0.93 (0.81, 1.07) | 56           | 1.04 (0.79, 1.37)    | 12             | 2.56 (1.38, 4.75)    |
| 91 to 180      | 502  | 0.92 (0.82, 1.04) | 145          | 1.12 (0.92, 1.35)    | 21             | 1.74 (1.06, 2.87)    |
|                |      |                   |              |                      |                |                      |
| 1 to 30        | 349  | 1.02 (0.90, 1.14) | 476          | 6.55 (5.82, 7.38)    | 177            | 24.78 (18.80, 32.66) |

**Note on Supplementary Figures 1 – 3.** These figures were obtained using the SCCS spline model for exposures. The risk period begins 30 days before the Covid-19 date and ends 180 days after it.

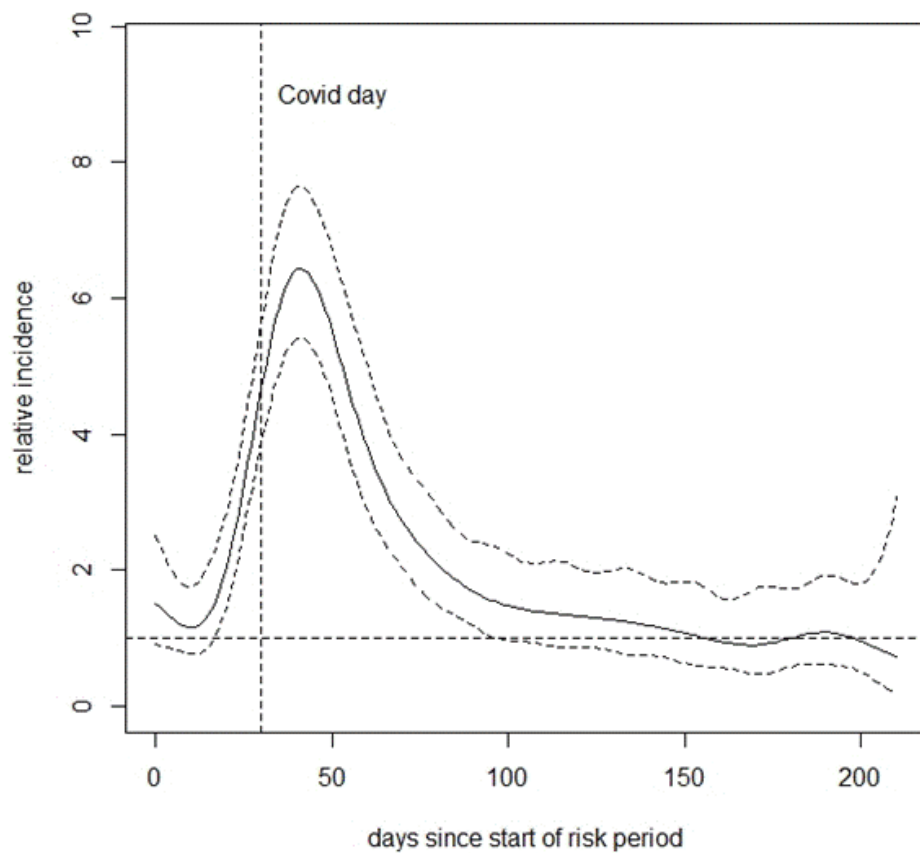

**Supplementary Figure 1.** Relative incidence of DVT during the risk period Covid day – 30 to Covid day +180, with 95% confidence bands. The horizontal dashed line is at RI = 1, the vertical dashed line marks the Covid day.

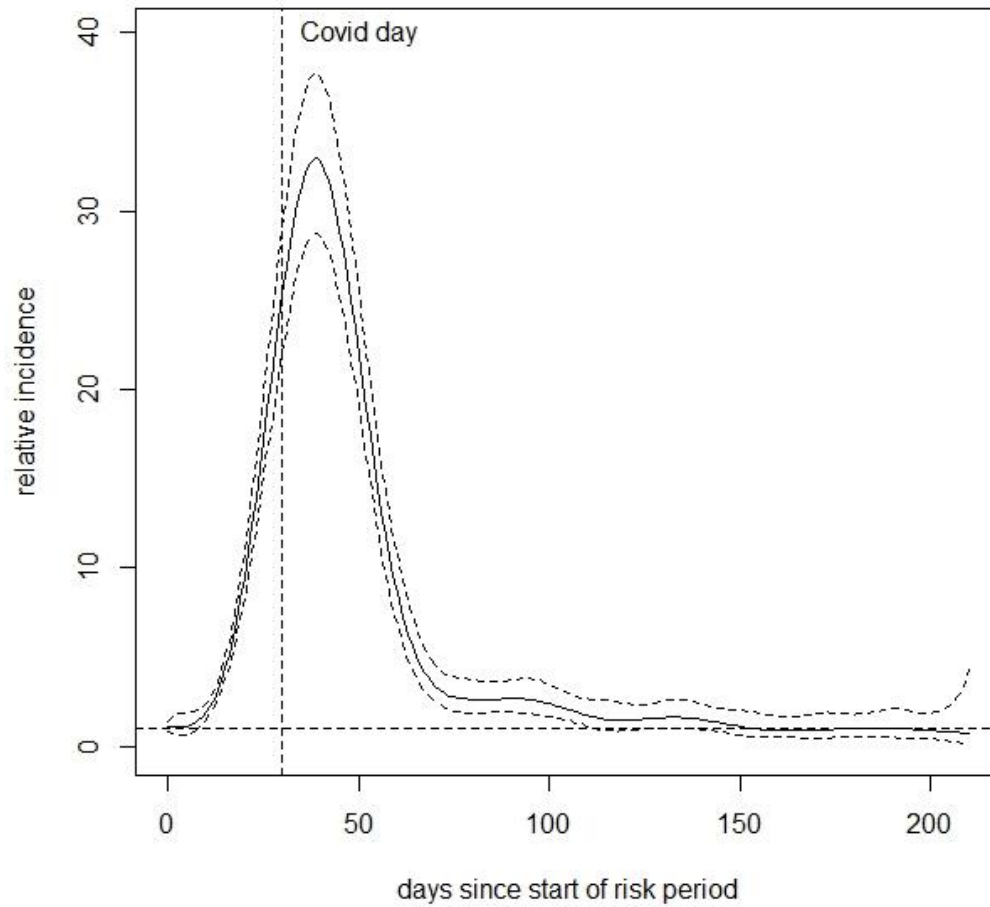

**Supplementary Figure 2.** Relative incidence of PE during the risk period, Covid day – 30 to Covid day +180, with 95% confidence bands. The horizontal dashed line is at RI = 1, the vertical dashed line marks the Covid day.

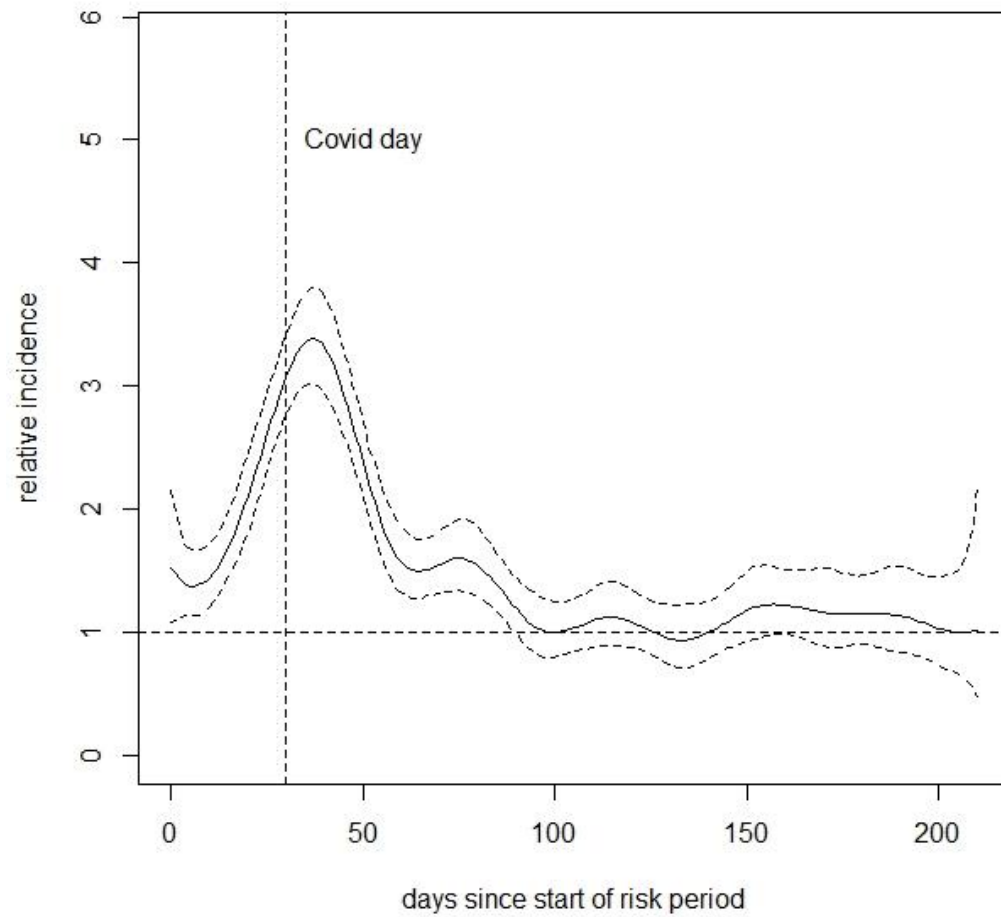

**Supplementary Figure 3.** Relative incidence of Bleeding during the risk period, Covid day – 30 to Covid day +180, with 95% confidence bands. The horizontal dashed line is at RI = 1, the vertical dashed line marks the Covid day.

**Table 10.** Unadjusted and adjusted conditional Poisson regression models for deep venous thrombosis (DVT), pulmonary embolism (PE) and bleeding within 30 days following COVID-19 onset in the matched cohort study.

| Outcome         | Variables     | Categories | No event (%)     | Event (%)        | Univariable RR (95%CI) | p-value | Multivariable RR (95%CI) | p-value |
|-----------------|---------------|------------|------------------|------------------|------------------------|---------|--------------------------|---------|
| <b>DVT</b>      | COVID-19      | Negative   | 3931211 (99.993) | 267 (0.007)      | 1 (ref)                |         | 1 (ref)                  |         |
|                 |               | Positive   | 1035519 (99.961) | 401 (0.039)      | 5.63 (4.82-6.57)       | 0.0000  | 4.98 (4.96-5.01)         | 0.0000  |
|                 | wCCI          | Mean (SD)  | 0.72 (1.73)      | 1.70 (2.49)      | 1.13 (1.09-1.17)       | 0.0000  | 1.08 (1.08-1.08)         | 0.0000  |
|                 | Cancer        | No         | 4895045 (99.988) | 592 (0.012)      | 1 (ref)                |         | 1 (ref)                  |         |
|                 |               | Yes        | 71685 (99.894)   | 76 (0.106)       | 3.53 (2.54-4.91)       | 0.0000  | 4.80 (4.74-4.85)         | 0.0000  |
|                 | Surgery       | No         | 4946040 (99.989) | 546 (0.011)      | 1 (ref)                |         | 1 (ref)                  |         |
|                 |               | Yes        | 20690 (99.414)   | 122 (0.586)      | 37.19 (20.54-67.34)    | 0.0000  | 19.28 (18.95-19.62)      | 0.0000  |
|                 | Anticoagulant | No         | 4937117 (99.987) | 652 (0.013)      | 1 (ref)                |         | -                        |         |
|                 |               | Yes        | 29613 (99.946)   | 16 (0.054)       | 1.45 (0.8-2.63)        | 0.2199  | -                        | -       |
|                 | <b>PE</b>     | COVID-19   | Negative         | 3931307 (99.996) | 171 (0.004)            | 1 (ref) |                          | 1 (ref) |
| Positive        |               |            | 1034159 (99.830) | 1761 (0.170)     | 38.03 (32.5-44.5)      | 0.0000  | 33.05 (32.8-33.3)        | 0.0000  |
| wCCI            |               | Mean (SD)  | 0.72 (1.73)      | 1.55 (2.39)      | 1.08 (1.06-1.11)       | 0.0000  | 1.09 (1.09-1.1)          | 0.0000  |
| Cancer          |               | No         | 4893864 (99.964) | 1773 (0.036)     | 1 (ref)                |         | 1 (ref)                  |         |
|                 |               | Yes        | 71602 (99.778)   | 159 (0.222)      | 1.54 (1.26-1.88)       | 0.0000  | 2.31 (2.27-2.36)         | 0.0000  |
| Surgery         |               | No         | 4945110 (99.970) | 1476 (0.030)     | 1 (ref)                |         | 1 (ref)                  |         |
|                 |               | Yes        | 20356 (97.809)   | 456 (2.191)      | 57.06 (39.19-83.09)    | 0.0000  | 17.76 (17.31-18.22)      | 0.0000  |
| Anticoagulant   |               | No         | 4935869 (99.962) | 1900 (0.038)     | 1 (ref)                |         | 1 (ref)                  |         |
|                 |               | Yes        | 29597 (99.892)   | 32 (0.108)       | 0.57 (0.39-0.83)       | 0.0038  | 0.3 (0.29-0.31)          | 0.0000  |
| <b>Bleeding</b> |               | COVID-19   | Negative         | 3648254 (99.965) | 1292 (0.035)           | 1 (ref) |                          | 1 (ref) |
|                 | Positive      |            | 992875 (99.899)  | 1002 (0.101)     | 2.67 (2.46-2.9)        | 0.0000  | 1.88 (1.71-2.07)         | 0.0000  |
|                 | wCCI          | Mean (SD)  | 0.66 (1.67)      | 1.73 (2.54)      | 1.15 (1.12-1.17)       | 0.0000  | 1.1 (1.08-1.13)          | 0.0000  |
|                 | Cancer        | No         | 4582941 (99.954) | 2099 (0.046)     | 1 (ref)                |         | 1 (ref)                  |         |
|                 |               | Yes        | 58188 (99.666)   | 195 (0.334)      | 2.12 (1.75-2.57)       | 0.0000  | 1.96 (1.56-2.46)         | 0.0000  |
|                 | Surgery       | No         | 4623806 (99.961) | 1827 (0.039)     | 1 (ref)                |         | 1 (ref)                  |         |
|                 |               | Yes        | 17323 (97.375)   | 467 (2.625)      | 34.3 (25.24-46.61)     | 0.0000  | 24.1 (17.59-33.03)       | 0.0000  |
|                 | Anticoagulant | No         | 4615151 (99.953) | 2160 (0.047)     | 1 (ref)                |         | 1 (ref)                  |         |
|                 |               | Yes        | 25978 (99.487)   | 134 (0.513)      | 2.61 (2.06-3.3)        | 0.0000  | 2.37 (1.79-3.14)         | 0.0000  |

Data are n (%) or mean (SD) except where otherwise stated. Percentages are calculated as a proportion of the included study population; individuals with a previous event were excluded from the study. Day 0 is excluded from the first study period due to risk of selection bias. RR=relative risk. CI= Confidence interval. wCCI=weighted Charlson Comorbidity Index.

**Table 11.** Unadjusted and adjusted conditional Poisson regression models for deep venous thrombosis (DVT), pulmonary embolism (PE) and bleeding within 30 days following COVID-19 onset in the matched cohort study stratified by COVID-19 severity.

| Outcome         | Variable       | Category       | Not event        | Event            | Multivariable RR (95%CI) | p-value |
|-----------------|----------------|----------------|------------------|------------------|--------------------------|---------|
| <b>DVT</b>      | Severity       | Uninfected     | 3931211 (99.993) | 267 (0.007)      | 1 (ref)                  |         |
|                 |                | Mild           | 982981 (99.984)  | 155 (0.016)      | 2.8 (2.26 - 3.47)        | 0.0000  |
|                 |                | Hospitalized   | 45564 (99.644)   | 163 (0.356)      | 20.21 (13.07 - 31.25)    | 0.0000  |
|                 |                | Intensive care | 6974 (98.824)    | 83 (1.176)       | 30.58 (10.57 - 88.46)    | 0.0000  |
|                 | wCCI           | Mean (SD)      | 0.72 (1.73)      | 1.70 (2.49)      | 1.08 (1.03 - 1.14)       | 0.0017  |
|                 | Cancer         | No             | 4895045 (99.988) | 592 (0.012)      | 1 (ref)                  |         |
|                 |                | Yes            | 71685 (99.894)   | 76 (0.106)       | 4.81 (3.08 - 7.51)       | 0.0000  |
|                 | Surgery        | No             | 4946040 (99.989) | 546 (0.011)      | 1 (ref)                  |         |
|                 |                | Yes            | 20690 (99.414)   | 122 (0.586)      | 10.03 (4.92 - 20.45)     | 0.0000  |
|                 | Anticoagulant  | No             | 4937117 (99.987) | 652 (0.013)      | 1 (ref)                  |         |
|                 |                | Yes            | 29613 (99.946)   | 16 (0.054)       | 1.15 (0.46 - 2.87)       | 0.7676  |
|                 | <b>PE</b>      | Severity       | Uninfected       | 3931307 (99.996) | 171 (0.004)              | 1 (ref) |
| Mild            |                |                | 982897 (99.976)  | 239 (0.024)      | 6.77 (5.43 - 8.45)       | 0.0000  |
| Hospitalized    |                |                | 44690 (97.732)   | 1037 (2.268)     | 139.16 (94.32 - 205.31)  | 0.0000  |
| Intensive care  |                |                | 6572 (93.127)    | 485 (6.873)      | 289.38 (91.55 - 914.73)  | 0.0000  |
| wCCI            |                | Mean (SD)      | 0.72 (1.73)      | 1.55 (2.39)      | 1.1 (1.03 - 1.17)        | 0.0029  |
| Cancer          |                | No             | 4893864 (99.964) | 1773 (0.036)     | 1 (ref)                  |         |
|                 |                | Yes            | 71602 (99.778)   | 159 (0.222)      | 2.17 (1.34 - 3.51)       | 0.0016  |
| Surgery         |                | No             | 4945110 (99.970) | 1476 (0.030)     | 1 (ref)                  |         |
|                 |                | Yes            | 20356 (97.809)   | 456 (2.191)      | 11.99 (5.71 - 25.17)     | 0.0000  |
| Anticoagulant   |                | No             | 4935869 (99.962) | 1900 (0.038)     | 1 (ref)                  |         |
|                 |                | Yes            | 29597 (99.892)   | 32 (0.108)       | 0.22 (0.07 - 0.7)        | 0.0103  |
| <b>Bleeding</b> |                | Severity       | Uninfected       | 3648254 (99.965) | 1292 (0.035)             | 1 (ref) |
|                 | Mild           |                | 947246 (99.963)  | 349 (0.037)      | 1.03 (0.91 - 1.17)       | 0.6433  |
|                 | Hospitalized   |                | 39279 (98.825)   | 467 (1.175)      | 7.4 (6 - 9.12)           | 0.0000  |
|                 | Intensive care |                | 6350 (97.154)    | 186 (2.846)      | 22.68 (10.67 - 48.2)     | 0.0000  |
|                 | wCCI           | Mean (SD)      | 0.66 (1.67)      | 1.73 (2.54)      | 1.09 (1.06 - 1.12)       | 0.0000  |
|                 | Cancer         | No             | 4582941 (99.954) | 2099 (0.046)     | 1 (ref)                  |         |
|                 |                | Yes            | 58188 (99.666)   | 195 (0.334)      | 2.19 (1.72 - 2.79)       | 0.0000  |
|                 | Surgery        | No             | 4623806 (99.961) | 1827 (0.039)     | 1 (ref)                  |         |
|                 |                | Yes            | 17323 (97.375)   | 467 (2.625)      | 14.23 (10.17 - 19.91)    | 0.0000  |
|                 | Anticoagulant  | No             | 4615151 (99.953) | 2160 (0.047)     | 1 (ref)                  |         |
|                 |                | Yes            | 26405 (99.469)   | 141 (0.531)      | 2.33 (1.72 - 3.16)       | 0.0000  |

Data are n (%) or mean (SD) except where otherwise stated. Percentages are calculated as a proportion of the included study population; individuals with a previous event were excluded from the study. Day 0 is excluded from the first study period due to risk of selection bias. RR=relative risk. CI= Confidence interval. wCCI=weighted Charlson Comorbidity Index.



**Table 12.** Unadjusted and adjusted conditional Poisson regression models for deep venous thrombosis (DVT) within 1 to 30 days following COVID-19 onset in the matched cohort study stratified by pandemic wave.

| Waves         | Variable      | Categories | No DVT (%)       | DVT (%)          | Univariable RR (95%CI)     | p-value                 | Multivariable RR (95%CI)  | p-value                 |               |
|---------------|---------------|------------|------------------|------------------|----------------------------|-------------------------|---------------------------|-------------------------|---------------|
| <b>Wave 1</b> | COVID-19      | No         | 254734 (99.992)  | 20 (0.008)       | 1 (ref)                    |                         | 1 (ref)                   |                         |               |
|               |               | Yes        | 73282 (99.842)   | 116 (0.158)      | <b>20.5 (12.74-32.98)</b>  | <b>0.0000</b>           | <b>14.86 (8.54-25.86)</b> | <b>0.0000</b>           |               |
|               | wCCI          | Mean (SD)  | 1.02 (2.02)      | 1.39 (2.17)      | 1.03 (0.94-1.13)           | 0.5477                  | 0.88 (0.74-1.03)          | 0.1132                  |               |
|               | Cancer        | No         | 317527 (99.961)  | 125 (0.039)      | 1 (ref)                    |                         | 1 (ref)                   |                         |               |
|               |               | Yes        | 10489 (99.895)   | 11 (0.105)       | 1.3 (0.63-2.68)            | 0.4733                  | 2.53 (0.66-9.66)          | 0.1747                  |               |
|               | Surgery       | No         | 324373 (99.972)  | 91 (0.028)       | 1 (ref)                    |                         | 1 (ref)                   |                         |               |
|               |               | Yes        | 3643 (98.780)    | 45 (1.220)       | -                          | 0.9331                  | -                         | 0.9437                  |               |
|               | Anticoagulant | No         | 321880 (99.958)  | 134 (0.042)      | 1 (ref)                    |                         | 1 (ref)                   |                         |               |
|               |               | Yes        | 6136 (99.967)    | 2 (0.033)        | 0.77 (0.17-3.59)           | 0.7446                  | 1.14 (0.13-10.24)         | 0.9054                  |               |
|               | <b>Wave 2</b> | COVID-19   | No               | 1814741 (99.992) | 141 (0.008)                | 1 (ref)                 |                           | 1 (ref)                 |               |
|               |               |            | Yes              | 490871 (99.970)  | 145 (0.030)                | <b>3.8 (3.01-4.79)</b>  | <b>0.0000</b>             | <b>3.42 (2.63-4.46)</b> | <b>0.0000</b> |
|               |               | wCCI       | Mean (SD)        | 0.73 (1.75)      | 2.04 (2.81)                | <b>1.15 (1.09-1.21)</b> | <b>0.0000</b>             | <b>1.08 (1.02-1.16)</b> | <b>0.0153</b> |
| Cancer        |               | No         | 2269063 (99.989) | 239 (0.011)      | 1 (ref)                    |                         | 1 (ref)                   |                         |               |
|               |               | Yes        | 36549 (99.872)   | 47 (0.128)       | <b>6.2 (3.79-10.13)</b>    | <b>0.0000</b>           | <b>6.63 (3.72-11.82)</b>  | <b>0.0000</b>           |               |
| Surgery       |               | No         | 2297484 (99.989) | 243 (0.011)      | 1 (ref)                    |                         | 1 (ref)                   |                         |               |
|               |               | Yes        | 8128 (99.474)    | 43 (0.526)       | <b>30.79 (12.18-77.86)</b> | <b>0.0000</b>           | <b>15.82 (5.72-43.75)</b> | <b>0.0000</b>           |               |
| Anticoagulant |               | No         | 2289791 (99.988) | 275 (0.012)      | 1 (ref)                    |                         | 1 (ref)                   |                         |               |
|               |               | Yes        | 15821 (99.931)   | 11 (0.069)       | 1.73 (0.81-3.67)           | 0.1538                  | 1.04 (0.35-3.04)          | 0.9477                  |               |
| <b>Wave 3</b> |               | COVID-19   | No               | 1861736 (99.994) | 106 (0.006)                | 1 (ref)                 |                           | 1 (ref)                 |               |
|               |               |            | Yes              | 471366 (99.970)  | 140 (0.030)                | <b>5.2 (4.04-6.7)</b>   | <b>0.0000</b>             | <b>5.15 (3.91-6.79)</b> | <b>0.0000</b> |
|               |               | wCCI       | Mean (SD)        | 0.66 (1.67)      | 1.49 (2.23)                | <b>1.16 (1.08-1.23)</b> | <b>0.0000</b>             | <b>1.12 (1.03-1.22)</b> | <b>0.0055</b> |
|               | Cancer        | No         | 2308455 (99.990) | 228 (0.010)      | 1 (ref)                    |                         | 1 (ref)                   |                         |               |
|               |               | Yes        | 24647 (99.927)   | 18 (0.073)       | <b>3.1 (1.62-5.93)</b>     | <b>0.0006</b>           | <b>4.54 (1.98-10.41)</b>  | <b>0.0004</b>           |               |
|               | Surgery       | No         | 2324183 (99.991) | 212 (0.009)      | 1 (ref)                    |                         | 1 (ref)                   |                         |               |
|               |               | Yes        | 8919 (99.620)    | 34 (0.380)       | <b>19.18 (8.5-43.28)</b>   | <b>0.0000</b>           | <b>16.48 (6.74-40.29)</b> | <b>0.0000</b>           |               |
|               | Anticoagulant | No         | 2325446 (99.990) | 243 (0.010)      | 1 (ref)                    |                         | 1 (ref)                   |                         |               |
|               |               | Yes        | 7656 (99.961)    | 3 (0.039)        | 1.5 (0.4-5.65)             | 0.5492                  | 1.47 (0.28-7.74)          | 0.6479                  |               |

Data are n (%) or mean (SD) except where otherwise stated. Percentages are calculated as a proportion of the included study population; individuals with a previous DVT were excluded from the study. Day 0 is excluded from the first study period due to risk of selection bias. RR=relative risk. CI= Confidence interval. wCCI=weighted Charlson Comorbidity Index.

**Table 13.** Unadjusted and adjusted conditional Poisson regression models for pulmonary embolism (PE) within 1 to 30 days following COVID-19 onset in the matched cohort study stratified by pandemic waves.

| Waves         | Variable      | Categories | No PE (%)        | PE (%)           | Univariable RR (95%CI)        | p-value                    | Multivariable RR (95%CI)   | p-value                    |               |
|---------------|---------------|------------|------------------|------------------|-------------------------------|----------------------------|----------------------------|----------------------------|---------------|
| <b>Wave 1</b> | COVID-19      | No         | 254736 (99.993)  | 18 (0.007)       | 1 (ref)                       |                            | 1 (ref)                    |                            |               |
|               |               | Yes        | 73006 (99.466)   | 392 (0.534)      | <b>75.87 (47.28-121.74)</b>   | <b>0.0000</b>              | <b>54.43 (32.06-92.4)</b>  | <b>0.0000</b>              |               |
|               | wCCI          | Mean (SD)  | 1.01 (2.02)      | 1.66 (2.57)      | <b>1.08 (1.03-1.14)</b>       | <b>0.0014</b>              | 1.14 (0.99-1.32)           | 0.0714                     |               |
|               | Cancer        | No         | 317274 (99.881)  | 378 (0.119)      | 1 (ref)                       |                            | 1 (ref)                    |                            |               |
|               |               | Yes        | 10468 (99.695)   | 32 (0.305)       | <b>1.62 (1.04-2.52)</b>       | <b>0.0339</b>              | 1.8 (0.43-7.6)             | 0.4221                     |               |
|               | Surgery       | No         | 324200 (99.919)  | 264 (0.081)      | 1 (ref)                       |                            | 1 (ref)                    |                            |               |
|               |               | Yes        | 3542 (96.041)    | 146 (3.959)      | <b>513.34 (71.81-3669.74)</b> | <b>0.0000</b>              | <b>10.79 (1.4-82.94)</b>   | <b>0.0222</b>              |               |
|               | Anticoagulant | No         | 321612 (99.875)  | 402 (0.125)      | 1 (ref)                       |                            | 1 (ref)                    |                            |               |
|               |               | Yes        | 6130 (99.870)    | 8 (0.130)        | <b>0.64 (0.3-1.39)</b>        | <b>0.2598</b>              | 0.16 (0.02-1.24)           | 0.0800                     |               |
|               | <b>Wave 2</b> | COVID-19   | No               | 1814788 (99.995) | 94 (0.005)                    | 1 (ref)                    |                            | 1 (ref)                    |               |
|               |               |            | Yes              | 490260 (99.846)  | 756 (0.154)                   | <b>29.42 (23.73-36.46)</b> | <b>0.0000</b>              | <b>25.27 (20.17-31.67)</b> | <b>0.0000</b> |
|               |               | wCCI       | Mean (SD)        | 0.73 (1.75)      | 1.73 (2.45)                   | <b>1.09 (1.05-1.12)</b>    | <b>0.0000</b>              | 1.04 (0.97-1.12)           | 0.2752        |
| Cancer        |               | No         | 2268542 (99.967) | 760 (0.033)      | 1 (ref)                       |                            | 1 (ref)                    |                            |               |
|               |               | Yes        | 36506 (99.754)   | 90 (0.246)       | <b>1.74 (1.32-2.28)</b>       | <b>0.0001</b>              | <b>2.41 (1.39-4.18)</b>    | <b>0.0018</b>              |               |
| Surgery       |               | No         | 2297040 (99.970) | 687 (0.030)      | 1 (ref)                       |                            | 1 (ref)                    |                            |               |
|               |               | Yes        | 8008 (98.005)    | 163 (1.995)      | <b>72.21 (35.49-146.92)</b>   | <b>0.0000</b>              | <b>12.17 (4.57-32.38)</b>  | <b>0.0000</b>              |               |
| Anticoagulant |               | No         | 2289235 (99.964) | 831 (0.036)      | 1 (ref)                       |                            | 1 (ref)                    |                            |               |
|               |               | Yes        | 15813 (99.880)   | 19 (0.120)       | 0.67 (0.41-1.11)              | 0.1173                     | 0.59 (0.21-1.7)            | 0.3308                     |               |
| <b>Wave 3</b> |               | COVID-19   | No               | 1861783 (99.997) | 59 (0.003)                    | 1 (ref)                    |                            | 1 (ref)                    |               |
|               |               |            | Yes              | 470893 (99.870)  | 613 (0.130)                   | <b>40.19 (30.77-52.51)</b> | <b>0.0000</b>              | <b>44.35 (32.09-61.29)</b> | <b>0.0000</b> |
|               |               | wCCI       | Mean (SD)        | 0.66 (1.67)      | 1.27 (2.18)                   | <b>1.07 (1.03-1.12)</b>    | <b>0.0020</b>              | <b>1.19 (1.08-1.32)</b>    | <b>0.0009</b> |
|               | Cancer        | No         | 2308048 (99.972) | 635 (0.028)      | 1 (ref)                       |                            | 1 (ref)                    |                            |               |
|               |               | Yes        | 24628 (99.850)   | 37 (0.150)       | 1.18 (0.8-1.74)               | 0.3967                     | 2.18 (0.96-4.96)           | 0.0643                     |               |
|               | Surgery       | No         | 2323870 (99.977) | 525 (0.023)      | 1 (ref)                       |                            | 1 (ref)                    |                            |               |
|               |               | Yes        | 8806 (98.358)    | 147 (1.642)      | <b>28.08 (17.59-44.82)</b>    | <b>0.0000</b>              | <b>26.96 (12.36-58.82)</b> | <b>0.0000</b>              |               |
|               | Anticoagulant | No         | 2325022 (99.971) | 667 (0.029)      | 1 (ref)                       |                            | 1 (ref)                    |                            |               |
|               |               | Yes        | 7654 (99.935)    | 5 (0.065)        | <b>0.33 (0.13-0.83)</b>       | <b>0.0180</b>              | <b>0.03 (0-0.39)</b>       | <b>0.0068</b>              |               |

Data are n (%) or mean (SD) except where otherwise stated. Percentages are calculated as a proportion of the included study population; individuals with a previous PE were excluded from the study. Day 0 is excluded from the first study period due to risk of selection bias. RR=relative risk. CI= Confidence interval. wCCI=weighted Charlson Comorbidity Index.

**Table 14.** Unadjusted and adjusted conditional Poisson regression models for bleeding within 1 to 30 days following COVID-19 onset in the matched cohort study stratified by pandemic waves.

| Waves         | Variable      | Categories | No bleeding (%)  | Bleeding (%)     | Univariable RR (95%CI)       | p-value       | Multivariable RR (95%CI)   | p-value       |
|---------------|---------------|------------|------------------|------------------|------------------------------|---------------|----------------------------|---------------|
| <b>Wave 1</b> | COVID-19      | No         | 222649 (99.953)  | 105 (0.047)      | 1 (ref)                      |               | 1 (ref)                    |               |
|               |               | Yes        | 67347 (99.645)   | 240 (0.355)      | <b>7.5 (5.95-9.44)</b>       | <b>0.0000</b> | <b>3.65 (2.76-4.83)</b>    | <b>0.0000</b> |
|               | wCCI          | Mean (SD)  | 0.88 (1.89)      | 1.96 (2.65)      | <b>1.15 (1.09-1.22)</b>      | <b>0.0000</b> | <b>1.12 (1.05-1.21)</b>    | <b>0.0015</b> |
|               | Cancer        | No         | 282462 (99.891)  | 308 (0.109)      | 1 (ref)                      |               | 1 (ref)                    |               |
|               |               | Yes        | 7534 (99.511)    | 37 (0.489)       | <b>2.38 (1.52-3.73)</b>      | <b>0.0002</b> | <b>2.43 (1.33-4.46)</b>    | <b>0.0041</b> |
|               | Surgery       | No         | 287014 (99.923)  | 220 (0.077)      | 1 (ref)                      |               | 1 (ref)                    |               |
|               |               | Yes        | 2982 (95.977)    | 125 (4.023)      | <b>104.01 (38.41-281.68)</b> | <b>0.0000</b> | <b>28.67 (10.17-80.87)</b> | <b>0.0000</b> |
|               | Anticoagulant |            | 285464 (99.889)  | 316 (0.111)      | 1 (ref)                      |               | 1 (ref)                    |               |
|               |               |            | 4532 (99.364)    | 29 (0.636)       | <b>2.54 (1.54-4.21)</b>      | <b>0.0003</b> | <b>2.62 (1.4-4.93)</b>     | <b>0.0028</b> |
|               | <b>Wave 2</b> | COVID-19   | No               | 1677052 (99.959) | 684 (0.041)                  | 1 (ref)       |                            | 1 (ref)       |
| Yes           |               |            | 469622 (99.913)  | 409 (0.087)      | <b>2.02 (1.78-2.28)</b>      | <b>0.0000</b> | <b>1.44 (1.25-1.66)</b>    | <b>0.0000</b> |
| wCCI          |               | Mean (SD)  | 0.68 (1.68)      | 1.83 (2.57)      | <b>1.14 (1.11-1.18)</b>      | <b>0.0000</b> | <b>1.1 (1.06-1.14)</b>     | <b>0.0000</b> |
| Cancer        |               | No         | 2117120 (99.954) | 980 (0.046)      | 1 (ref)                      |               | 1 (ref)                    |               |
|               |               | Yes        | 29554 (99.619)   | 113 (0.381)      | <b>2.4 (1.86-3.11)</b>       | <b>0.0000</b> | <b>2.22 (1.65-2.98)</b>    | <b>0.0000</b> |
| Surgery       |               | No         | 2140065 (99.958) | 897 (0.042)      | 1 (ref)                      |               | 1 (ref)                    |               |
|               |               | Yes        | 6609 (97.120)    | 196 (2.880)      | <b>25.06 (16.5-38.07)</b>    | <b>0.0000</b> | <b>20.55 (13.37-31.58)</b> | <b>0.0000</b> |
| Anticoagulant |               |            | 2132985 (99.952) | 1026 (0.048)     | 1 (ref)                      |               | 1 (ref)                    |               |
|               |               |            | 13689 (99.513)   | 67 (0.487)       | <b>2.44 (1.76-3.39)</b>      | <b>0.0000</b> | <b>2.13 (1.45-3.14)</b>    | <b>0.0001</b> |
| <b>Wave 3</b> |               | COVID-19   | No               | 1748553 (99.971) | 503 (0.029)                  | 1 (ref)       |                            | 1 (ref)       |
|               | Yes           |            | 455906 (99.923)  | 353 (0.077)      | <b>2.53 (2.21-2.9)</b>       | <b>0.0000</b> | <b>2.09 (1.79-2.44)</b>    | <b>0.0000</b> |
|               | wCCI          | Mean (SD)  | 0.62 (1.62)      | 1.50 (2.45)      | <b>1.14 (1.1-1.18)</b>       | <b>0.0000</b> | <b>1.12 (1.07-1.16)</b>    | <b>0.0000</b> |
|               | Cancer        | No         | 2183359 (99.963) | 811 (0.037)      | 1 (ref)                      |               | 1 (ref)                    |               |
|               |               | Yes        | 21100 (99.787)   | 45 (0.213)       | <b>1.54 (1.07-2.23)</b>      | <b>0.0217</b> | 1.26 (0.8-2)               | 0.3184        |
|               | Surgery       | No         | 2196727 (99.968) | 710 (0.032)      | 1 (ref)                      |               | 1 (ref)                    |               |
|               |               | Yes        | 7732 (98.147)    | 146 (1.853)      | <b>31.3 (18.66-52.51)</b>    | <b>0.0000</b> | <b>24.13 (14.2-40.99)</b>  | <b>0.0000</b> |
|               | Anticoagulant |            | 2196702 (99.963) | 818 (0.037)      | 1 (ref)                      |               | 1 (ref)                    |               |
|               |               |            | 7757 (99.513)    | 38 (0.487)       | <b>3.02 (1.93-4.72)</b>      | <b>0.0000</b> | <b>3.00 (1.74-5.19)</b>    | <b>0.0001</b> |

Data are n (%) or mean (SD) except where otherwise stated. Percentages are calculated as a proportion of the included study population; individuals with a previous bleeding event were excluded from the study. Day 0 is excluded from the first study period due to risk of selection bias. RR=relative risk. CI= Confidence interval. wCCI=weighted Charlson Comorbidity Index.

**Table 15.** Unadjusted and adjusted conditional Poisson regression models for first and recurrent deep venous thrombosis (DVT) from 1 to 30 days following COVID-19 onset in the matched cohort study.

| <b>Variable</b>      | <b>Categories</b> | <b>No DVT (%)</b> | <b>DVT (%)</b> | <b>Univariable RR<br/>(95% CI)</b> | <b>p-value</b> | <b>Multivariable RR<br/>(95% CI)</b> | <b>p-value</b> |
|----------------------|-------------------|-------------------|----------------|------------------------------------|----------------|--------------------------------------|----------------|
| <b>COVID-19</b>      | No                | 4075763 (99.986)  | 579 (0.014)    | <b>1 (ref)</b>                     |                | <b>1 (ref)</b>                       |                |
|                      | Yes               | 1056580 (99.944)  | 594 (0.056)    | <b>3.98 (3.55-4.47)</b>            | <b>0.0000</b>  | <b>4.5 (3.84-5.29)</b>               | <b>0.0000</b>  |
| <b>Previous VTE</b>  | No                | 5048915 (99.986)  | 718 (0.014)    | <b>1 (ref)</b>                     |                | <b>1 (ref)</b>                       |                |
|                      | Yes               | 83428 (99.458)    | 455 (0.542)    | <b>21.09 (16.54-26.88)</b>         | <b>0.0000</b>  | <b>27.53 (20.48-37.01)</b>           | <b>0.0000</b>  |
| <b>wCCI</b>          | Mean (SD)         | 0.75 (1.77)       | 1.99 (2.73)    | <b>1.17 (1.14-1.21)</b>            | <b>0.0000</b>  | <b>1.1 (1.05-1.14)</b>               | <b>0.0000</b>  |
| <b>Cancer</b>        | No                | 5049565 (99.980)  | 1024 (0.020)   | <b>1 (ref)</b>                     |                | <b>1 (ref)</b>                       |                |
|                      | Yes               | 82778 (99.820)    | 149 (0.180)    | <b>3.67 (2.89-4.66)</b>            | <b>0.0000</b>  | <b>3.06 (2.11-4.42)</b>              | <b>0.0000</b>  |
| <b>Surgery</b>       | No                | 5109505 (99.980)  | 1004 (0.020)   | <b>1 (ref)</b>                     |                | <b>1 (ref)</b>                       |                |
|                      | Yes               | 549 (76.462)      | 169 (23.538)   | <b>325.11 (80.64-1310.72)</b>      | <b>0.0000</b>  | <b>234.18 (53.86-1018.18)</b>        | <b>0.0000</b>  |
| <b>Anticoagulant</b> | No                | 5089455 (99.979)  | 1065 (0.021)   | <b>1 (ref)</b>                     |                | <b>1 (ref)</b>                       |                |
|                      | Yes               | 42888 (99.749)    | 108 (0.251)    | <b>4.46 (3.35-5.95)</b>            | <b>0.0000</b>  | 1.45 (0.87-2.41)                     | 0.1539         |

Data are n (%) or mean (SD) except where otherwise stated. Percentages are calculated as a proportion of the included study population. Day 0 is excluded from the study period due to risk of selection bias. RR=relative risk. CI= Confidence interval. wCCI=weighted Charlson Comorbidity Index.

**Table 16.** Unadjusted and adjusted conditional Poisson regression models for first and recurrent pulmonary embolism (PE) from 1 to 30 days following COVID-19 onset in the matched cohort study.

| Variable             | Categories | No PE (%)        | PE (%)       | Univariable RR (95%CI)     | p-value       | Multivariable RR (95%CI)   | p-value       |
|----------------------|------------|------------------|--------------|----------------------------|---------------|----------------------------|---------------|
| <b>COVID-19</b>      | No         | 4075898 (99.989) | 444 (0.011)  | <b>1 (ref)</b>             |               | <b>1 (ref)</b>             |               |
|                      | Yes        | 1054948 (99.789) | 2226 (0.211) | <b>19.39 (17.51-21.47)</b> | <b>0.0000</b> | <b>34.68 (30.05-40.02)</b> | <b>0.0000</b> |
| <b>Previous VTE</b>  | No         | 5047544 (99.959) | 2089 (0.041) | <b>1 (ref)</b>             |               | <b>1 (ref)</b>             |               |
|                      | Yes        | 83302 (99.307)   | 581 (0.693)  | <b>6.32 (5.5-7.26)</b>     | <b>0.0000</b> | <b>22.66 (18.17-28.26)</b> | <b>0.0000</b> |
| <b>wCCI</b>          | Mean (SD)  | 0.75 (1.77)      | 1.76 (2.55)  | <b>1.09 (1.07-1.11)</b>    | <b>0.0000</b> | 1.03 (1-1.07)              | 0.0753        |
| <b>Cancer</b>        | No         | 5048182 (99.952) | 2407 (0.048) | <b>1 (ref)</b>             |               | <b>1 (ref)</b>             |               |
|                      | Yes        | 82664 (99.683)   | 263 (0.317)  | <b>1.68 (1.44-1.97)</b>    | <b>0.0000</b> | <b>1.95 (1.47-2.59)</b>    | <b>0.0000</b> |
| <b>Surgery</b>       | No         | 5108416 (99.959) | 2093 (0.041) | 1 (ref)                    |               | -                          |               |
|                      | Yes        | 141 (19.638)     | 577 (80.362) | NA                         | 0.6390        | -                          | -             |
| <b>Anticoagulant</b> | No         | 5087988 (99.950) | 2532 (0.050) | 1 (ref)                    |               | 1 (ref)                    |               |
|                      | Yes        | 42858 (99.679)   | 138 (0.321)  | <b>1.56 (1.27-1.91)</b>    | <b>0.0000</b> | 1.12 (0.81-1.55)           | 0.5058        |

Data are n (%) or mean (SD) except where otherwise stated. Percentages are calculated as a proportion of the included study population. Day 0 is excluded from the study period due to risk of selection bias. RR=relative risk. CI= Confidence interval. wCCI=weighted Charlson Comorbidity Index.

**Table 17.** Unadjusted and adjusted conditional Poisson regression models for first and recurrent bleeding events from 1 to 90 days following COVID-19 onset in the matched cohort study.

| <b>Variable</b>          | <b>Categories</b> | <b>No bleeding (%)</b> | <b>Bleeding (%)</b> | <b>Univariable RR<br/>(95%CI)</b> | <b>p-value</b> | <b>Multivariable RR<br/>(95%CI)</b> | <b>p-value</b> |
|--------------------------|-------------------|------------------------|---------------------|-----------------------------------|----------------|-------------------------------------|----------------|
| <b>COVID-19</b>          | No                | 4073972 (99.942)       | 2370 (0.058)        | <b>1 (ref)</b>                    |                | <b>1 (ref)</b>                      |                |
|                          | Yes               | 1055497 (99.841)       | 1677 (0.159)        | <b>2.74 (2.57-2.92)</b>           | <b>0.0000</b>  | <b>1.9 (1.76-2.05)</b>              | <b>0.0000</b>  |
| <b>Previous bleeding</b> | No                | 4869147 (99.948)       | 2547 (0.052)        | <b>1 (ref)</b>                    |                | <b>1 (ref)</b>                      |                |
|                          | Yes               | 260322 (99.427)        | 1500 (0.573)        | <b>4.68 (4.29-5.1)</b>            | <b>0.0000</b>  | <b>4.24 (3.84-4.69)</b>             | <b>0.0000</b>  |
| <b>wCCI</b>              | Mean (SD)         | 0.75 (1.77)            | 2.27 (2.86)         | <b>1.16 (1.14-1.17)</b>           | <b>0.0000</b>  | <b>1.07 (1.05-1.08)</b>             | <b>0.0000</b>  |
| <b>Cancer</b>            | No                | 5046985 (99.929)       | 3604 (0.071)        | <b>1 (ref)</b>                    |                | <b>1 (ref)</b>                      |                |
|                          | Yes               | 82484 (99.466)         | 443 (0.534)         | <b>2.05 (1.81-2.32)</b>           | <b>0.0000</b>  | <b>1.74 (1.48-2.04)</b>             | <b>0.0000</b>  |
| <b>Surgery</b>           | No                | 5107362 (99.937)       | 3197 (0.063)        | <b>1 (ref)</b>                    |                | <b>1 (ref)</b>                      |                |
|                          | Yes               | 22107 (96.297)         | 850 (3.703)         | <b>23.93 (19.96-28.68)</b>        | <b>0.0000</b>  | <b>16.08 (13.23-19.55)</b>          | <b>0.0000</b>  |
| <b>Anticoagulant</b>     | No                | 5086803 (99.927)       | 3717 (0.073)        | <b>1 (ref)</b>                    |                | <b>1 (ref)</b>                      |                |
|                          | Yes               | 42666 (99.232)         | 330 (0.768)         | <b>2.29 (1.98-2.65)</b>           | <b>0.0000</b>  | <b>1.5 (1.25-1.8)</b>               | <b>0.0000</b>  |

Data are n (%) or mean (SD) except where otherwise stated. Percentages are calculated as a proportion of the included study population. Day 0 is excluded from the study period due to risk of selection bias. RR=relative risk. CI= Confidence interval. wCCI=weighted Charlson Comorbidity Index.

**Table 18.** Unadjusted and adjusted conditional Poisson regression models for deep vein thrombosis within 1 to 30 days following COVID-19 onset in the matched cohort study with individual comorbidity groupings displayed from the Charlson Comorbidity Index.

| Variable                                     | Categories | Not DVT (%)      | DVT (%)     | Univariable<br>RR (95%CI)  | p-value       | Multivariable<br>RR (95%CI) | p-value       |
|----------------------------------------------|------------|------------------|-------------|----------------------------|---------------|-----------------------------|---------------|
| <b>COVID19</b>                               | No         | 3931211 (99.993) | 267 (0.007) | <b>1 (ref)</b>             |               | <b>1 (ref)</b>              |               |
|                                              | Yes        | 1035519 (99.961) | 401 (0.039) | <b>5.63 (4.82-6.57)</b>    | <b>0.0000</b> | <b>5.09 (5.06-5.11)</b>     | <b>0.0000</b> |
| <b>Surgery</b>                               | No         | 4946040 (99.989) | 546 (0.011) | <b>1 (ref)</b>             |               | <b>1 (ref)</b>              |               |
|                                              | Yes        | 20690 (99.414)   | 122 (0.586) | <b>37.19 (20.54-67.34)</b> | <b>0.0000</b> | <b>17.04 (16.75-17.33)</b>  | <b>0.0000</b> |
| <b>Anticoagulant</b>                         | No         | 4937117 (99.987) | 652 (0.013) | 1 (ref)                    |               | -                           |               |
|                                              | Yes        | 29613 (99.946)   | 16 (0.054)  | 1.45 (0.8-2.63)            | 0.2199        | -                           | -             |
| <b>Myocardial infarction</b>                 | No         | 4901902 (99.987) | 636 (0.013) | 1 (ref)                    |               | -                           |               |
|                                              | Yes        | 64828 (99.951)   | 32 (0.049)  | 1.35 (0.88-2.07)           | 0.1721        | -                           | -             |
| <b>Congestive heart failure</b>              | No         | 4909897 (99.987) | 637 (0.013) | 1 (ref)                    |               | -                           |               |
|                                              | Yes        | 56833 (99.945)   | 31 (0.055)  | 1.55 (1-2.4)               | 0.0522        | -                           | -             |
| <b>Peripheral vascular disease</b>           | No         | 4934814 (99.987) | 652 (0.013) | 1 (ref)                    |               | -                           |               |
|                                              | Yes        | 31916 (99.950)   | 16 (0.050)  | 1.44 (0.81-2.59)           | 0.2164        | -                           | -             |
| <b>Cerebrovascular disease</b>               | No         | 4868189 (99.987) | 628 (0.013) | 1 (ref)                    |               | -                           |               |
|                                              | Yes        | 98541 (99.959)   | 40 (0.041)  | 1.22 (0.84-1.78)           | 0.3033        | -                           | -             |
| <b>Chronic obstructive pulmonary disease</b> | No         | 4931729 (99.987) | 647 (0.013) | 1 (ref)                    |               | -                           |               |
|                                              | Yes        | 35001 (99.940)   | 21 (0.060)  | 1.42 (0.85-2.38)           | 0.1800        | -                           | -             |
| <b>Chronic other pulmonary disease</b>       | No         | 4642266 (99.987) | 610 (0.013) | <b>1 (ref)</b>             |               | <b>1 (ref)</b>              |               |
|                                              | Yes        | 324464 (99.982)  | 58 (0.018)  | <b>1.91 (1.38-2.65)</b>    | <b>0.0001</b> | <b>1.54 (1.53-1.56)</b>     | <b>0.0000</b> |
| <b>Rheumatic disease</b>                     | No         | 4837821 (99.987) | 619 (0.013) | <b>1 (ref)</b>             |               | <b>1 (ref)</b>              |               |
|                                              | Yes        | 128909 (99.962)  | 49 (0.038)  | <b>1.59 (1.13-2.25)</b>    | <b>0.0075</b> | <b>1.69 (1.67-1.71)</b>     | <b>0.0000</b> |
| <b>Dementia</b>                              | No         | 4945034 (99.987) | 656 (0.013) | 1 (ref)                    |               | -                           |               |
|                                              | Yes        | 21696 (99.945)   | 12 (0.055)  | 1.02 (0.52-1.99)           | 0.9588        | -                           | -             |
| <b>Hemiplegia</b>                            | No         | 4940863 (99.987) | 658 (0.013) | 1 (ref)                    |               | -                           |               |
|                                              | Yes        | 25867 (99.961)   | 10 (0.039)  | 1.78 (0.83-3.79)           | 0.1366        | -                           | -             |
| <b>Diabetes without chronic complication</b> | No         | 4962235 (99.987) | 664 (0.013) | <b>1 (ref)</b>             |               | <b>1 (ref)</b>              |               |
|                                              | Yes        | 4495 (99.911)    | 4 (0.089)   | <b>13.44 (1.49-121.57)</b> | <b>0.0207</b> | <b>31.8 (29.34-34.47)</b>   | <b>0.0000</b> |
| <b>Diabetes with chronic complication</b>    | No         | 4914946 (99.987) | 640 (0.013) | <b>1 (ref)</b>             |               | <b>1 (ref)</b>              |               |
|                                              | Yes        | 51784 (99.946)   | 28 (0.054)  | <b>2.08 (1.29-3.36)</b>    | <b>0.0026</b> | <b>0.97 (0.95-0.98)</b>     | <b>0.0004</b> |

Table continued on next page...

**Table 18 (contd).** Unadjusted and adjusted conditional Poisson regression models for deep vein thrombosis within 1 to 30 days following COVID-19 onset in the matched cohort study with individual comorbidity groupings displayed from the Charlson Comorbidity Index.

| Variable (contd)              | Categories | Not DVT (%)      | DVT (%)     | Univariable<br>RR (95%CI) | p-value       | Multivariable<br>RR (95%CI) | p-value       |
|-------------------------------|------------|------------------|-------------|---------------------------|---------------|-----------------------------|---------------|
| <b>Renal disease</b>          | No         | 4927757 (99.987) | 640 (0.013) | 1 (ref)                   |               | 1 (ref)                     |               |
|                               | Yes        | 38973 (99.928)   | 28 (0.072)  | <b>3.42 (2.01-5.8)</b>    | <b>0.0000</b> | <b>2.76 (2.7-2.81)</b>      | <b>0.0000</b> |
| <b>Mild liver disease</b>     | No         | 4929597 (99.987) | 648 (0.013) | <b>1 (ref)</b>            |               | <b>1 (ref)</b>              |               |
|                               | Yes        | 37133 (99.946)   | 20 (0.054)  | <b>3.22 (1.75-5.93)</b>   | <b>0.0002</b> | <b>4.48 (4.39-4.57)</b>     | <b>0.0000</b> |
| <b>Liver special</b>          | No         | 4964444 (99.987) | 665 (0.013) | 1 (ref)                   |               | -                           |               |
|                               | Yes        | 2286 (99.869)    | 3 (0.131)   | 2.88 (0.64-12.88)         | 0.1669        | -                           | -             |
| <b>Severe liver disease</b>   | No         | 4963302 (99.987) | 662 (0.013) | 1 (ref)                   |               | -                           |               |
|                               | Yes        | 3428 (99.825)    | 6 (0.175)   | 2.85 (0.99-8.26)          | 0.0532        | -                           | -             |
| <b>Peptic ulcer disease</b>   | No         | 4927557 (99.987) | 659 (0.013) | 1 (ref)                   |               | -                           |               |
|                               | Yes        | 39173 (99.977)   | 9 (0.023)   | 0.63 (0.31-1.27)          | 0.1953        | -                           | -             |
| <b>Malignancy</b>             | No         | 4661670 (99.988) | 554 (0.012) | <b>1 (ref)</b>            |               | <b>1 (ref)</b>              |               |
|                               | Yes        | 305060 (99.963)  | 114 (0.037) | <b>1.32 (1.03-1.68)</b>   | <b>0.0265</b> | <b>2.09 (2.08-2.11)</b>     | <b>0.0000</b> |
| <b>Metastatic solid tumor</b> | No         | 4941597 (99.987) | 632 (0.013) | <b>1 (ref)</b>            |               | <b>1 (ref)</b>              |               |
|                               | Yes        | 25133 (99.857)   | 36 (0.143)  | <b>4.7 (2.86-7.71)</b>    | <b>0.0000</b> | <b>7.28 (7.16-7.4)</b>      | <b>0.0000</b> |
| <b>Aids</b>                   | No         | 4682170 (99.987) | 626 (0.013) | 1 (ref)                   |               | -                           |               |
|                               | Yes        | 284560 (99.985)  | 42 (0.015)  | 1.09 (0.76-1.56)          | 0.6289        | -                           | -             |

Data are n (%) or mean (SD) except where otherwise stated. Percentages are calculated as a proportion of the included study population; individuals with a previous event were excluded from the study. Day 0 is excluded from the first study period due to risk of selection bias. RR=relative risk. CI= Confidence interval.



**Table 19.** Unadjusted and adjusted conditional Poisson regression models for pulmonary embolism within 1 to 30 days following COVID-19 onset in the matched cohort study with individual comorbidity groupings displayed from the Charlson Comorbidity Index.

| Variable                                     | Categories | Not PE (%)       | PE (%)       | Univariable<br>RR (95%CI)  | p-value       | Multivariable<br>RR (95%CI) | p-value       |
|----------------------------------------------|------------|------------------|--------------|----------------------------|---------------|-----------------------------|---------------|
| <b>COVID19</b>                               | No         | 3931307 (99.996) | 171 (0.004)  | <b>1 (ref)</b>             |               | <b>1 (ref)</b>              |               |
|                                              | Yes        | 1034159 (99.830) | 1761 (0.170) | <b>38.03 (32.5-44.5)</b>   | <b>0.0000</b> | <b>32.99 (32.73-33.26)</b>  | <b>0.0000</b> |
| <b>Surgery</b>                               | No         | 4945110 (99.970) | 1476 (0.030) | <b>1 (ref)</b>             |               | <b>1 (ref)</b>              |               |
|                                              | Yes        | 20356 (97.809)   | 456 (2.191)  | <b>57.06 (39.19-83.09)</b> | <b>0.0000</b> | <b>20.09 (19.52-20.68)</b>  | <b>0.0000</b> |
| <b>Anticoagulant</b>                         | No         | 4935869 (99.962) | 1900 (0.038) | <b>1 (ref)</b>             |               | <b>1 (ref)</b>              |               |
|                                              | Yes        | 29597 (99.892)   | 32 (0.108)   | <b>0.57 (0.39-0.83)</b>    | <b>0.0038</b> | <b>0.31 (0.3-0.33)</b>      | <b>0.0000</b> |
| <b>Myocardial infarction</b>                 | No         | 4900717 (99.963) | 1821 (0.037) | 1 (ref)                    |               | -                           |               |
|                                              | Yes        | 64749 (99.829)   | 111 (0.171)  | 1.04 (0.84-1.3)            | 0.7061        | -                           | -             |
| <b>Congestive heart failure</b>              | No         | 4908695 (99.963) | 1839 (0.037) | 1 (ref)                    |               | -                           |               |
|                                              | Yes        | 56771 (99.836)   | 93 (0.164)   | 1.09 (0.85-1.4)            | 0.4776        | -                           | -             |
| <b>Peripheral vascular disease</b>           | No         | 4933598 (99.962) | 1868 (0.038) | 1 (ref)                    |               | -                           |               |
|                                              | Yes        | 31868 (99.800)   | 64 (0.200)   | 1.32 (0.98-1.78)           | 0.0637        | -                           | -             |
| <b>Cerebrovascular disease</b>               | No         | 4867067 (99.964) | 1750 (0.036) | 1 (ref)                    |               | 1 (ref)                     |               |
|                                              | Yes        | 98399 (99.815)   | 182 (0.185)  | <b>1.38 (1.15-1.67)</b>    | <b>0.0006</b> | <b>0.9 (0.88-0.92)</b>      | <b>0.0000</b> |
| <b>Chronic obstructive pulmonary disease</b> | No         | 4930535 (99.963) | 1841 (0.037) | <b>1 (ref)</b>             |               | <b>1 (ref)</b>              |               |
|                                              | Yes        | 34931 (99.740)   | 91 (0.260)   | <b>1.79 (1.38-2.33)</b>    | <b>0.0000</b> | <b>1.28 (1.25-1.32)</b>     | <b>0.0000</b> |
| <b>Chronic other pulmonary disease</b>       | No         | 4641103 (99.962) | 1773 (0.038) | <b>1 (ref)</b>             |               | <b>1 (ref)</b>              |               |
|                                              | Yes        | 324363 (99.951)  | 159 (0.049)  | <b>1.82 (1.49-2.21)</b>    | <b>0.0000</b> | <b>1.27 (1.24-1.3)</b>      | <b>0.0000</b> |
| <b>Rheumatic disease</b>                     | No         | 4836626 (99.963) | 1814 (0.037) | <b>1 (ref)</b>             |               | <b>1 (ref)</b>              |               |
|                                              | Yes        | 128840 (99.908)  | 118 (0.092)  | <b>1.39 (1.11-1.73)</b>    | <b>0.0034</b> | <b>1.57 (1.53-1.61)</b>     | <b>0.0000</b> |
| <b>Dementia</b>                              | No         | 4943815 (99.962) | 1875 (0.038) | <b>1 (ref)</b>             |               | <b>1 (ref)</b>              |               |
|                                              | Yes        | 21651 (99.737)   | 57 (0.263)   | <b>1.54 (1.11-2.14)</b>    | <b>0.0099</b> | <b>0.77 (0.74-0.79)</b>     | <b>0.0000</b> |
| <b>Hemiplegia</b>                            | No         | 4939617 (99.961) | 1904 (0.039) | 1 (ref)                    |               | -                           |               |
|                                              | Yes        | 25849 (99.892)   | 28 (0.108)   | 1.37 (0.88-2.13)           | 0.1627        | -                           | -             |
| <b>Diabetes without chronic complication</b> | No         | 4960973 (99.961) | 1926 (0.039) | 1 (ref)                    |               | -                           |               |
|                                              | Yes        | 4493 (99.867)    | 6 (0.133)    | 2.88 (1-8.3)               | 0.0506        | -                           | -             |
| <b>Diabetes with chronic complication</b>    | No         | 4913735 (99.962) | 1851 (0.038) | <b>1 (ref)</b>             |               | <b>1 (ref)</b>              |               |
|                                              | Yes        | 51731 (99.844)   | 81 (0.156)   | <b>1.72 (1.31-2.26)</b>    | <b>0.0001</b> | <b>1.68 (1.62-1.73)</b>     | <b>0.0000</b> |

Table continued on next page..

**Table 19 (continued).** Unadjusted and adjusted conditional Poisson regression models for pulmonary embolism within 1 to 30 days following COVID-19 onset in the matched cohort study with individual comorbidity groupings displayed from the Charlson Comorbidity Index.

| Variable (continued)          | Categories | Not PE (%)       | PE (%)       | Univariable RR (95%CI)  | p-value       | Multivariable RR (95%CI) | p-value       |
|-------------------------------|------------|------------------|--------------|-------------------------|---------------|--------------------------|---------------|
| <b>Renal disease</b>          | No         | 4926530 (99.962) | 1867 (0.038) | <b>1 (ref)</b>          |               | 1 (ref)                  |               |
|                               | Yes        | 38936 (99.833)   | 65 (0.167)   | <b>1.8 (1.33-2.44)</b>  | <b>0.0001</b> | 1.02 (0.99-1.06)         | 0.1688        |
| <b>Mild liver disease</b>     | No         | 4928333 (99.961) | 1912 (0.039) | 1 (ref)                 |               | -                        |               |
|                               | Yes        | 37133 (99.946)   | 20 (0.054)   | 0.99 (0.6-1.62)         | 0.953         | -                        | -             |
| <b>Liver special</b>          | No         | 4963182 (99.961) | 1927 (0.039) | 1 (ref)                 |               | -                        |               |
|                               | Yes        | 2284 (99.782)    | 5 (0.218)    | 2.56 (0.81-8.13)        | 0.1096        | -                        | -             |
| <b>Severe liver disease</b>   | No         | 4962037 (99.961) | 1927 (0.039) | 1 (ref)                 |               | -                        |               |
|                               | Yes        | 3429 (99.854)    | 5 (0.146)    | 1.1 (0.4-2.98)          | 0.8548        | -                        | -             |
| <b>Peptic ulcer disease</b>   | No         | 4926336 (99.962) | 1880 (0.038) | 1 (ref)                 |               | -                        |               |
|                               | Yes        | 39130 (99.867)   | 52 (0.133)   | 1.31 (0.95-1.81)        | 0.1025        | -                        | -             |
| <b>Malignancy</b>             | No         | 4660610 (99.965) | 1614 (0.035) | 1 (ref)                 |               | -                        |               |
|                               | Yes        | 304856 (99.896)  | 318 (0.104)  | 1.02 (0.89-1.18)        | 0.7456        | -                        | -             |
| <b>Metastatic solid tumor</b> | No         | 4940351 (99.962) | 1878 (0.038) | 1 (ref)                 |               | 1 (ref)                  |               |
|                               | Yes        | 25115 (99.785)   | 54 (0.215)   | <b>2.05 (1.46-2.87)</b> | <b>0.0000</b> | <b>5.6 (5.43-5.78)</b>   | <b>0.0000</b> |
| <b>Aids</b>                   | No         | 4680985 (99.961) | 1811 (0.039) | 1 (ref)                 |               | -                        |               |
|                               | Yes        | 284481 (99.957)  | 121 (0.043)  | 1.22 (0.98-1.51)        | 0.0759        | -                        | -             |

Data are n (%) or mean (SD) except where otherwise stated. Percentages are calculated as a proportion of the included study population; individuals with a previous event were excluded from the study. Day 0 is excluded from the first study period due to risk of selection bias. RR=relative risk. CI= Confidence interval.

**Table 20.** Unadjusted and adjusted conditional Poisson regression models for bleeding within 1 to 30 days following COVID-19 onset in the matched cohort study with individual comorbidity groupings displayed from the Charlson Comorbidity Index.

| Variable                                     | Categories | Not bleeding (%) | Bleeding (%) | Univariable RR (95%CI)    | p-value       | Multivariable RR (95%CI)  | p-value       |
|----------------------------------------------|------------|------------------|--------------|---------------------------|---------------|---------------------------|---------------|
| <b>COVID19</b>                               | No         | 3648254 (99.965) | 1292 (0.035) | <b>1 (ref)</b>            |               | <b>1 (ref)</b>            |               |
|                                              | Yes        | 992875 (99.899)  | 1002 (0.101) | <b>2.67 (2.46-2.9)</b>    | <b>0.0000</b> | <b>1.85 (1.84-1.86)</b>   | <b>0.0000</b> |
| <b>Surgery</b>                               | No         | 4623806 (99.961) | 1827 (0.039) | <b>1 (ref)</b>            |               | <b>1 (ref)</b>            |               |
|                                              | Yes        | 17323 (97.375)   | 467 (2.625)  | <b>34.3 (25.24-46.61)</b> | <b>0.0000</b> | <b>23.8 (23.41-24.19)</b> | <b>0.0000</b> |
| <b>Anticoagulant</b>                         | No         | 4615151 (99.953) | 2160 (0.047) | <b>1 (ref)</b>            |               | <b>1 (ref)</b>            |               |
|                                              | Yes        | 25978 (99.487)   | 134 (0.513)  | <b>2.61 (2.06-3.3)</b>    | <b>0.0000</b> | <b>2.23 (2.19-2.26)</b>   | <b>0.0000</b> |
| <b>Myocardial infarction</b>                 | No         | 4592004 (99.954) | 2116 (0.046) | <b>1 (ref)</b>            |               | <b>1 (ref)</b>            |               |
|                                              | Yes        | 49125 (99.639)   | 178 (0.361)  | <b>1.96 (1.61-2.4)</b>    | <b>0.0000</b> | <b>1.41 (1.39-1.43)</b>   | <b>0.0000</b> |
| <b>Congestive heart failure</b>              | No         | 4599218 (99.954) | 2117 (0.046) | <b>1 (ref)</b>            |               | <b>1 (ref)</b>            |               |
|                                              | Yes        | 41911 (99.579)   | 177 (0.421)  | <b>2.37 (1.92-2.93)</b>   | <b>0.0000</b> | <b>1.41 (1.39-1.43)</b>   | <b>0.0000</b> |
| <b>Peripheral vascular disease</b>           | No         | 4616835 (99.952) | 2208 (0.048) | <b>1 (ref)</b>            |               | <b>1 (ref)</b>            |               |
|                                              | Yes        | 24294 (99.647)   | 86 (0.353)   | <b>1.87 (1.42-2.47)</b>   | <b>0.0000</b> | <b>1.39 (1.36-1.41)</b>   | <b>0.0000</b> |
| <b>Cerebrovascular disease</b>               | No         | 4575816 (99.954) | 2085 (0.046) | <b>1 (ref)</b>            |               | <b>1 (ref)</b>            |               |
|                                              | Yes        | 65313 (99.681)   | 209 (0.319)  | <b>1.65 (1.37-1.99)</b>   | <b>0.0000</b> | <b>1.1 (1.09-1.12)</b>    | <b>0.0000</b> |
| <b>Chronic obstructive pulmonary disease</b> | No         | 4614251 (99.953) | 2185 (0.047) | <b>1 (ref)</b>            |               | <b>1 (ref)</b>            |               |
|                                              | Yes        | 26878 (99.596)   | 109 (0.404)  | <b>2.27 (1.76-2.93)</b>   | <b>0.0000</b> | <b>1.5 (1.48-1.53)</b>    | <b>0.0000</b> |
| <b>Chronic other pulmonary disease</b>       | No         | 4341244 (99.952) | 2075 (0.048) | <b>1 (ref)</b>            |               | <b>1 (ref)</b>            |               |
|                                              | Yes        | 299885 (99.927)  | 219 (0.073)  | <b>2.14 (1.8-2.56)</b>    | <b>0.0000</b> | <b>1.72 (1.7-1.73)</b>    | <b>0.0000</b> |
| <b>Rheumatic disease</b>                     | No         | 4528154 (99.952) | 2153 (0.048) | <b>1 (ref)</b>            |               | <b>1 (ref)</b>            |               |
|                                              | Yes        | 112975 (99.875)  | 141 (0.125)  | <b>1.39 (1.13-1.7)</b>    | <b>0.0015</b> | <b>1.16 (1.14-1.17)</b>   | <b>0.0000</b> |
| <b>Dementia</b>                              | No         | 4625008 (99.951) | 2248 (0.049) | <b>1 (ref)</b>            |               | -                         |               |
|                                              | Yes        | 16121 (99.715)   | 46 (0.285)   | 1.1 (0.77-1.55)           | 0.6055        | -                         | -             |
| <b>Hemiplegia</b>                            | No         | 4621167 (99.951) | 2250 (0.049) | <b>1 (ref)</b>            |               | <b>1 (ref)</b>            |               |
|                                              | Yes        | 19962 (99.780)   | 44 (0.220)   | <b>2.25 (1.53-3.33)</b>   | <b>0.0000</b> | <b>1.41 (1.37-1.44)</b>   | <b>0.0000</b> |
| <b>Diabetes without chronic complication</b> | No         | 4637072 (99.951) | 2288 (0.049) | <b>1 (ref)</b>            |               | <b>1 (ref)</b>            |               |
|                                              | Yes        | 4057 (99.852)    | 6 (0.148)    | <b>3.11 (1.04-9.3)</b>    | <b>0.0425</b> | <b>1.96 (1.82-2.11)</b>   | <b>0.0000</b> |
| <b>Diabetes with chronic complication</b>    | No         | 4597917 (99.952) | 2196 (0.048) | <b>1 (ref)</b>            |               | <b>1 (ref)</b>            |               |
|                                              | Yes        | 43212 (99.774)   | 98 (0.226)   | <b>1.93 (1.49-2.5)</b>    | <b>0.0000</b> | <b>1.03 (1.02-1.05)</b>   | <b>0.0001</b> |

Table continued on next page..

**Table 20 (continued).** Unadjusted and adjusted conditional Poisson regression models for bleeding within 1 to 30 days following COVID-19 onset in the matched cohort study with individual comorbidity groupings displayed from the Charlson Comorbidity Index.

| Variable (continued)          | Categories | Not bleeding (%) | Bleeding (%) | Univariable RR (95%CI)  | p-value       | Multivariable RR (95%CI) | p-value       |
|-------------------------------|------------|------------------|--------------|-------------------------|---------------|--------------------------|---------------|
| <b>Renal disease</b>          | No         | 4611811 (99.953) | 2188 (0.047) | <b>1 (ref)</b>          |               | <b>1 (ref)</b>           |               |
|                               | Yes        | 29318 (99.640)   | 106 (0.360)  | <b>2.46 (1.89-3.21)</b> | <b>0.0000</b> | <b>1.37 (1.34-1.39)</b>  | <b>0.0000</b> |
| <b>Mild liver disease</b>     | No         | 4608267 (99.952) | 2234 (0.048) | <b>1 (ref)</b>          |               | <b>1 (ref)</b>           |               |
|                               | Yes        | 32862 (99.818)   | 60 (0.182)   | <b>3.38 (2.36-4.83)</b> | <b>0.0000</b> | <b>2.89 (2.83-2.95)</b>  | <b>0.0000</b> |
| <b>Liver special</b>          | No         | 4638196 (99.951) | 2282 (0.049) | <b>1 (ref)</b>          |               | <b>1 (ref)</b>           |               |
|                               | Yes        | 2933 (99.593)    | 12 (0.407)   | <b>2.97 (1.37-6.45)</b> | <b>0.0059</b> | <b>0.66 (0.62-0.7)</b>   | <b>0.0000</b> |
| <b>Severe liver disease</b>   | No         | 4638800 (99.951) | 2283 (0.049) | <b>1 (ref)</b>          |               | <b>1 (ref)</b>           |               |
|                               | Yes        | 2329 (99.530)    | 11 (0.470)   | <b>4.12 (1.7-10)</b>    | <b>0.0018</b> | <b>2.64 (2.46-2.82)</b>  | <b>0.0000</b> |
| <b>Peptic ulcer disease</b>   | No         | 4615120 (99.952) | 2239 (0.048) | <b>1 (ref)</b>          |               | <b>1 (ref)</b>           |               |
|                               | Yes        | 26009 (99.789)   | 55 (0.211)   | <b>2.11 (1.49-2.99)</b> | <b>0.0000</b> | <b>1.55 (1.51-1.58)</b>  | <b>0.0000</b> |
| <b>Malignancy</b>             | No         | 4384652 (99.957) | 1880 (0.043) | <b>1 (ref)</b>          |               | <b>1 (ref)</b>           |               |
|                               | Yes        | 256477 (99.839)  | 414 (0.161)  | <b>1.39 (1.22-1.59)</b> | <b>0.0000</b> | <b>1.48 (1.47-1.49)</b>  | <b>0.0000</b> |
| <b>Metastatic solid tumor</b> | No         | 4619687 (99.951) | 2244 (0.049) | <b>1 (ref)</b>          |               | <b>1 (ref)</b>           |               |
|                               | Yes        | 21442 (99.767)   | 50 (0.233)   | <b>1.84 (1.29-2.62)</b> | <b>0.0007</b> | <b>1.92 (1.88-1.96)</b>  | <b>0.0000</b> |
| <b>Aids</b>                   | No         | 4383580 (99.952) | 2123 (0.048) | <b>1 (ref)</b>          |               | <b>1 (ref)</b>           |               |
|                               | Yes        | 257549 (99.934)  | 171 (0.066)  | <b>1.52 (1.26-1.84)</b> | <b>0.0000</b> | <b>1.33 (1.32-1.35)</b>  | <b>0.0000</b> |

Data are n (%) or mean (SD) except where otherwise stated. Percentages are calculated as a proportion of the included study population; individuals with a previous event were excluded from the study. Day 0 is excluded from the first study period due to risk of selection bias. RR=relative risk. CI= Confidence interval.
